# Supplementary material for: Comparative Transcriptome Analysis of Cell-Free Fetal RNA from Amniotic Fluid and RNA from Amniocytes in Uncomplicated Pregnancies
Source: PLoS One. 2015 Jul 16;10(7):e0132955. doi: 10.1371/journal.pone.0132955 (PMC4504687; doi:10.1371/journal.pone.0132955)
Supplement: S2 File — (XLSX) [file pone.0132955.s002.xlsx]

## Sheet: Table 2
Term	PValue	Benjamini	number of gene	gene
Expressed exclusively in testis	0.00790768	0.683734	5	VCX3A, BPY2B, BPY2C, BPY2, VCX
Heart	0.0182818	0.832998	4	SMYD1, ITGB1BP3, CALCRL, C15ORF56
Saliva	0.0213575	0.752435	3	PRB1, PRH2, C20ORF70
Blood	0.0463815	0.900076	6	C9, LST1, CD160, CTLA4, TMEM131, SPRR2A
Brain	0.0465459	0.842663	119	ADCY2, ACBD7, ADCYAP1, ALLC, ANKS1B, ATG12, ATXN7L1, B4GALNT1, BTN2A2, C13ORF26, C1ORF83, C20ORF118, C20ORF165, C2ORF55, C7ORF13, C9ORF170, CAMK2A, CCDC40, CDR2L, CLDN12, CPNE4, CPNE9, CPT1C, CREB3L2, CREBL2, CYP2U1, DAPK3, DDX28, DLEU7, DLK1, DNAJC16, DTNB, DZIP1L, ELL, ESR1, FAM120C, FAM123C, FOLH1, FSCB, GADD45B, GJC2, GPR149, GPR61, GPRC5B, GSTM2, GUCY1B3, HCN3, HEY1, HSD11B1, HSD11B1L, IGF1,…
Spleen	0.0527582	0.826659	11	C5ORF20, TAGAP, IL17REL, LOC644794, CFLAR, CD5L, CDC20, ZNF498, GDPD2, RELP, RAB11FIP1
Primary B-Cells	0.0946839	0.936504	2	PMPCB, WDR92
